# Supplementary material for: Association of diurnal temperature range with daily hospitalization for exacerbation of chronic respiratory diseases in 21 cities, China
Source: Springer Nature journal article supplement (doi:10.1186/s12931-020-01517-7), 2020-09-29
Supplement: MOESM1 [file 18429676]

**e-Figure 1. 21 cities in Guangdong Province.**

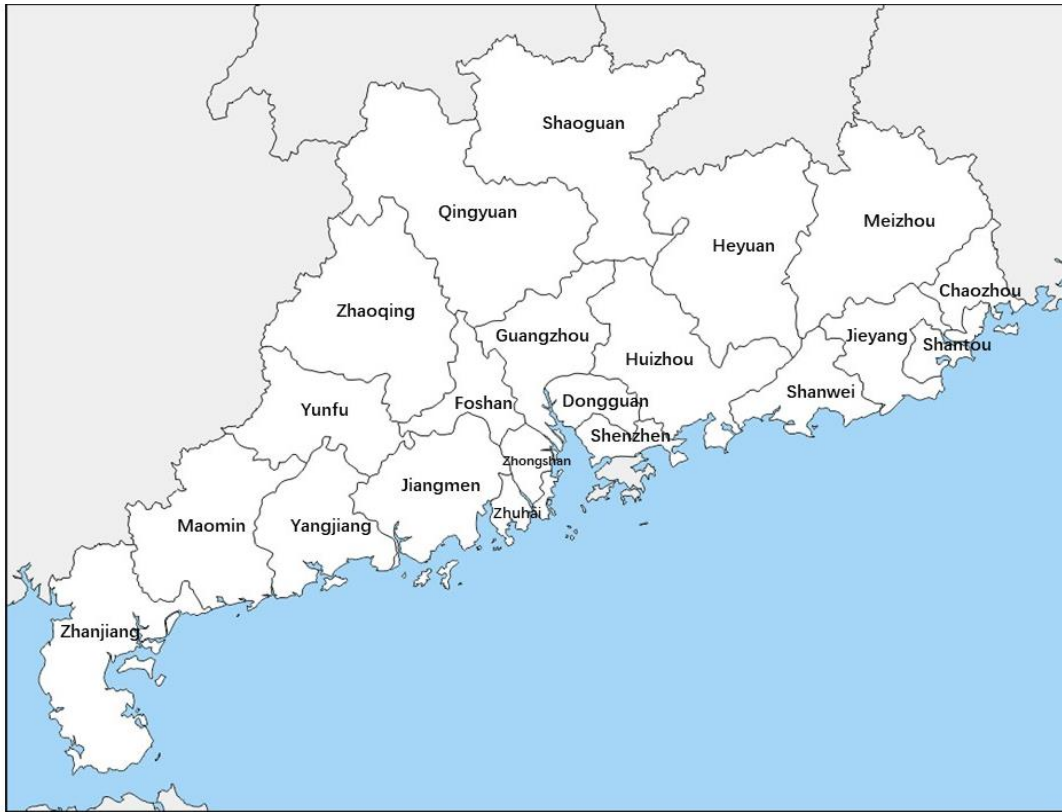

**e-Table 1. DTR level for 21 cities**

|           | Min | 25 <sup>th</sup> | 50 <sup>th</sup> | 75 <sup>th</sup> | Max  |
|-----------|-----|------------------|------------------|------------------|------|
| Chaozhou  | 1.6 | 5.7              | 8.0              | 10.3             | 20.1 |
| Dongguan  | 1.0 | 5.0              | 7.0              | 8.0              | 14.0 |
| Foshan    | 1.0 | 5.6              | 7.8              | 9.8              | 18.6 |
| Guangzhou | 1.0 | 5.5              | 8.0              | 10.0             | 18.5 |
| Heyuan    | 1.0 | 6.0              | 8.7              | 10.8             | 20.7 |
| Huizhou   | 1.0 | 6.0              | 8.0              | 9.0              | 15.0 |
| Jiangmen  | 1.0 | 4.0              | 5.5              | 6.5              | 12.5 |
| Jieyang   | 1.5 | 5.5              | 7.0              | 9.0              | 17.0 |
| Maoming   | 1.0 | 5.5              | 7.0              | 9.0              | 18.5 |
| Meizhou   | 1.0 | 6.4              | 9.0              | 11.3             | 21.3 |
| Qingyuan  | 1.2 | 5.4              | 7.7              | 9.8              | 19.7 |
| Shantou   | 0.0 | 4.5              | 6.0              | 7.0              | 16.0 |
| Shanwei   | 0.0 | 4.0              | 5.0              | 7.0              | 15.0 |
| Shaoguan  | 1.0 | 5.3              | 8.3              | 11.0             | 21.4 |
| Shenzhen  | 1.0 | 5.0              | 6.0              | 7.0              | 14.0 |
| Yangjiang | 1.0 | 4.0              | 6.0              | 7.0              | 14.0 |
| Yunfu     | 1.0 | 6.0              | 8.0              | 10.0             | 19.0 |
| Zhanjiang | 0.5 | 5.0              | 6.5              | 8.0              | 14.0 |
| Zhaoqing  | 1.0 | 5.5              | 8.0              | 9.5              | 18.5 |
| Zhongshan | 1.0 | 5.0              | 7.0              | 8.0              | 17.0 |
| Zhuhai    | 1.0 | 4.0              | 5.0              | 6.0              | 12.0 |

**e-Table 2. City-specific relative risks (95% CI) and heterogeneity from random-effect meta-analysis\***

|                    | COPD                | Asthma              | Bronchiectasis      | Chronic respiratory disease |
|--------------------|---------------------|---------------------|---------------------|-----------------------------|
| Chaozhou           | 0.97 (0.82 to 1.16) | 1.09 (0.75 to 1.59) | 1.05 (0.71 to 1.53) | 1.00 (0.86 to 1.16)         |
| Dongguan           | 1.11 (1.03 to 1.20) | 1.21 (1.04 to 1.40) | 0.98 (0.88 to 1.10) | 1.09 (1.03 to 1.16)         |
| Foshan             | 1.09 (1.04 to 1.15) | 1.01 (0.91 to 1.11) | 1.00 (0.93 to 1.07) | 1.06 (1.02 to 1.11)         |
| Guangzhou          | 1.08 (1.04 to 1.13) | 1.09 (1.00 to 1.19) | 1.04 (0.97 to 1.10) | 1.07 (1.03 to 1.12)         |
| Heyuan             | 1.07 (0.98 to 1.16) | 1.21 (0.93 to 1.58) | 1.04 (0.80 to 1.35) | 1.08 (0.99 to 1.17)         |
| Huizhou            | 1.11 (1.05 to 1.18) | 0.98 (0.83 to 1.16) | 1.20 (1.03 to 1.39) | 1.11 (1.05 to 1.18)         |
| Jiangmen           | 1.20 (0.99 to 1.45) | 0.88 (0.54 to 1.42) | 0.76 (0.50 to 1.15) | 1.08 (0.91 to 1.27)         |
| Jieyang            | 1.14 (1.03 to 1.26) | 1.22 (0.99 to 1.52) | 0.84 (0.67 to 1.06) | 1.10 (1.01 to 1.21)         |
| Maoming            | 1.09 (1.03 to 1.15) | 1.14 (1.01 to 1.28) | 1.01 (0.90 to 1.12) | 1.09 (1.04 to 1.14)         |
| Meizhou            | 1.03 (0.95 to 1.11) | 1.16 (0.93 to 1.44) | 1.21 (0.98 to 1.50) | 1.06 (0.99 to 1.13)         |
| Qingyuan           | 1.15 (1.09 to 1.21) | 1.04 (0.83 to 1.31) | 0.92 (0.79 to 1.07) | 1.13 (1.07 to 1.18)         |
| Shantou            | 1.10 (0.99 to 1.21) | 1.14 (0.96 to 1.35) | 1.01 (0.83 to 1.21) | 1.09 (1.01 to 1.19)         |
| Shanwei            | 1.16 (1.02 to 1.33) | 1.08 (0.73 to 1.59) | 0.90 (0.63 to 1.27) | 1.12 (0.99 to 1.27)         |
| Shaoguan           | 1.14 (1.07 to 1.20) | 1.11 (0.96 to 1.27) | 1.21 (1.05 to 1.39) | 1.14 (1.08 to 1.20)         |
| Shenzhen           | 1.04 (0.96 to 1.12) | 1.09 (0.97 to 1.23) | 1.04 (0.93 to 1.15) | 1.05 (0.99 to 1.11)         |
| Yangjiang          | 1.12 (1.00 to 1.26) | 1.02 (0.81 to 1.29) | 0.85 (0.66 to 1.10) | 1.07 (0.97 to 1.18)         |
| Yunfu              | 1.07 (0.98 to 1.16) | 0.98 (0.71 to 1.35) | 0.97 (0.72 to 1.31) | 1.06 (0.98 to 1.14)         |
| Zhanjiang          | 1.06 (1.00 to 1.12) | 1.22 (1.04 to 1.43) | 0.92 (0.81 to 1.05) | 1.05 (1.00 to 1.10)         |
| Zhaoqing           | 1.10 (1.03 to 1.17) | 0.95 (0.79 to 1.14) | 1.07 (0.91 to 1.25) | 1.08 (1.02 to 1.15)         |
| Zhongshan          | 1.11 (1.05 to 1.17) | 1.04 (0.89 to 1.23) | 1.02 (0.92 to 1.14) | 1.09 (1.04 to 1.14)         |
| Zhuhai             | 1.03 (0.61 to 1.74) | 0.55 (0.16 to 1.85) | 1.17 (0.59 to 2.30) | 1.00 (0.67 to 1.49)         |
| I <sup>2</sup> (%) | 36.61%              | 6.90%               | 1.01%               | 31.92%                      |
| Q test (p-value)   | 0.001               | 0.304               | 0.480               | 0.004                       |

\* Results are presented by relative risk (95% CI) at 75<sup>th</sup> percentile compared to 25<sup>th</sup> percentile of DTR at lag0-6.

**e-Table 3. Sensitivity analysis: relative risks (95% CI) of hospitalizations for exacerbations of chronic respiratory disease.\***

| Variables                                               | relative risks (95% CI) |
|---------------------------------------------------------|-------------------------|
| Numbers of moving average for diurnal temperature range |                         |
| 1 (lag 0)                                               | 1.02 (1.01 to 1.02)     |
| 3 (lag 0-2)                                             | 1.04 (1.03 to 1.06)     |
| 5 (lag 0-4)                                             | 1.07 (1.06 to 1.09)     |
| 7 (lag 0-6)                                             | 1.09 (1.07 to 1.10)     |
| 14 (lag 0-13)                                           | 1.09 (1.07 to 1.11)     |
| 21 (lag 0-20)                                           | 1.09 (1.06 to 1.12)     |
| Degree of freedom for time per years                    |                         |
| 6                                                       | 1.07 (1.06 to 1.09)     |
| 7                                                       | 1.07 (1.05 to 1.08)     |
| 8                                                       | 1.09 (1.07 to 1.10)     |
| 9                                                       | 1.08 (1.07 to 1.10)     |
| 10                                                      | 1.09 (1.08 to 1.10)     |
| Degree of freedom for meteorological measures           |                         |
| 3                                                       | 1.09 (1.07 to 1.10)     |
| 6                                                       | 1.09 (1.07 to 1.10)     |
| Spline function                                         |                         |
| natural cubic spline function                           | 1.09 (1.07 to 1.10)     |
| penalized splines function                              | 1.08 (1.07 to 1.10)     |
| Dataset                                                 |                         |
| cities with > 5 hosiptals data                          | 1.08 (1.07 to 1.10)     |
| 21 cities                                               | 1.09 (1.07 to 1.10)     |

\* Results are presented by relative risk (95% CI) at 75<sup>th</sup> percentile compared to 25<sup>th</sup> percentile of DTR at lag0-6.
